# Supplementary material for: Uncertainty and Motivation to Seek Information from Pharmacy Automated Communications
Source: Pharmacy (Basel). 2018 May 28;6(2):47. doi: 10.3390/pharmacy6020047 (PMC6025562; doi:10.3390/pharmacy6020047)
Supplement: Supplementary file 1 [file pharmacy-06-00047-s001.zip › Supplementary Data/Raw Data 013118.xls]

## Sheet: Form Responses 2
Timestamp	Have you ever received automated telephone calls from a pharmacy?	Do you like receiving automated telephone calls from a pharmacy?	Like Receiving Phone Calls	Have you ever received automated telephone calls from a pharmacy?	Received Calls	How often do you receive automated telephone calls from a pharmacy?	Receive 5 to 11 calls/year	Receive >12 calls/year	Have you ever had the occasion to use prescription medications?	Have you ever received automated telephone calls from a pharmacy?	Do you like receiving automated telephone calls from a pharmacy?	Have you ever had the occasion to use prescription medications?	How often have you contacted a Pharmacy for clarification of a message received from an automated telephone message?	After receiving an automated phone call from a pharmacy, which of the following best describes your experience?	After receiving an automated phone call from a pharmacy, which of the following best describes your experience?	After receiving an automated phone call from a pharmacy, which of the following best describes your experience?	After receiving an automated phone call from a pharmacy, which of the following best describes your experience?	After receiving an automated phone call from a pharmacy, which of the following best describes your experience?	After receiving automated telephone calls from a pharmacy, how relevant was the information provided?	After receiving automated telephone calls from a pharmacy, how meaningful was the information provided?	After receiving automated telephone calls from a pharmacy, how important was the information provided?	After receiving automated telephone calls from a pharmacy, how useful was the information provided?	After receiving automated telephone calls from a pharmacy, how helpful was the information provided?	To what extent do you feel that the communication received from the automated telephone message is:	To what extent do you feel that the communication received from the automated telephone message is:	To what extent do you feel that the communication received from the automated telephone message is:	To what extent do you feel that the communication received from the automated telephone message is:	To what extent do you feel that the communication received from the automated telephone message is:	I am always courteous even to people who are disagreeable.	There have been occasions when I took advantage of someone.	I sometimes try to get even rather than forgive and forget.	I sometimes feel resentful when I don't get my way.	No matter who I'm talking to, I'm always a good listener.	I don't like situations that are uncertain.	I dislike questions which could be answered in many different ways.	I find that a well ordered life with regular hours suit my temperament.	I feel uncomfortable when I don't understand the reason why an event occurred in my life.	I feel irritated when one person disagrees with what everyone else in a group believes.	I don't like to go into a situation without knowing what I can expect from it.	When I have made a decision, I feel relieved.	When I am confronted with a problem, I'm dying to reach a solution very quickly.	I would quickly become impatient and irritated if I would not find a solution to a problem immediately.	I don't like to be with people who are capable of unexpected actions.	I dislike it when a person's statement could mean many different things.	I find that establishing a consistent routine enables me to enjoy life more.	I enjoy having a clear and structured mode of life.	I do not usually consult many different opinions before forming my own view.	I dislike unpredictable situations.	Sex
2018-01-08 16:43:16	Yes	No	0	Yes	1	12 times or more per year	0	1				Yes	4 times or less per year	1	1	1	1	1	1	1	1	1	1	1	5	1	1	5	5	5	5	5	5	1	1	6	1	1	1	1	6	1	1	1	6	6	1	1	Male
2018-01-08 16:43:16	Yes	Yes	1	Yes	1	12 times or more per year	0	1				Yes	4 times or less per year	5	4	5	4	4	5	5	5	6	5	4	4	4	3	5	3	4	3	5	3	5	4	2	5	3	5	6	5	5	3	4	2	2	1	5	Female
2018-01-08 16:44:03	Yes	Yes	1	Yes	1	12 times or more per year	0	1				Yes	4 times or less per year	7	7	7	7	7	7	5	7	7	7	5	5	5	5	5	5	1	3	2	5	6	4	5	6	2	6	6	6	5	5	5	6	6	1	6	Female
2018-01-08 16:44:22	Yes	Yes	1	Yes	1	5 to 11 times per year	1	0				Yes	4 times or less per year	6	5	6	5	4	6	5	4	6	7	3	4	5	3	4	3	4	4	5	4	3	5	6	5	3	5	4	5	5	3	5	5	3	5	4	Male
2018-01-08 16:45:26	Yes	No	0	Yes	1	4 times or less per year	0	0				Yes	4 times or less per year	4	4	4	4	4	6	6	6	6	6	4	5	5	5	5	3	4	2	2	3	5	3	4	3	2	5	5	6	5	5	5	5	5	1	6	Female
2018-01-08 16:45:42	No			No	0		0	0				Yes																																					Male
2018-01-08 16:49:25	Yes	Yes	1	Yes	1	5 to 11 times per year	1	0				Yes	5 to 11 times per year	6	4	5	5	4	5	5	5	5	4	4	3	4	3	4	3	4	3	2	3	5	1	4	5	4	2	4	4	4	4	3	4	3	5	4	Male
2018-01-08 16:49:29	Yes	Yes	1	Yes	1	4 times or less per year	0	0				Yes	4 times or less per year	4	5	5	4	6	7	6	6	7	7	3	4	4	3	5	2	4	4	5	3	5	5	6	3	3	4	5	4	2	4	5	5	4	3	5	Male
2018-01-08 16:51:46	Yes	Yes	1	Yes	1	4 times or less per year	0	0				Yes	4 times or less per year	7	7	7	7	7	7	7	7	7	7	5	5	5	5	5	5	5	1	5	5	6	6	6	1	1	6	6	6	1	6	6	6	6	6	6	Male
2018-01-08 16:57:05	Yes	Yes	1	Yes	1	5 to 11 times per year	1	0				Yes	4 times or less per year	7	7	7	7	7	7	7	7	7	7	5	5	5	5	5	4	4	5	5	4	5	5	6	5	6	5	4	4	3	4	5	6	6	3	5	Female
2018-01-08 17:04:10	Yes	No	0	Yes	1	4 times or less per year	0	0				Yes	4 times or less per year	4	3	3	4	4	5	5	6	6	4	4	4	4	3	2	5	2	2	3	5	4	2	3	4	4	2	4	5	6	3	5	2	2	1	3	Female
2018-01-08 17:05:19	No			No	0		0	0				Yes																																					Male
2018-01-08 17:22:37	Yes	No	0	Yes	1	5 to 11 times per year	1	0				Yes	4 times or less per year	5	4	4	3	4	5	3	6	6	6	3	5	4	3	4	2	1	1	1	2	5	3	5	6	2	6	4	4	3	5	5	4	4	6	5	Female
2018-01-08 17:27:45	Yes	Yes	1	Yes	1	5 to 11 times per year	1	0				Yes	4 times or less per year	6	7	6	6	6	7	7	7	7	7	4	5	5	4	5	3	4	1	2	5	5	4	5	5	2	6	5	6	2	2	5	5	5	2	5	Female
2018-01-08 17:29:48	Yes	Yes	1	Yes	1	4 times or less per year	0	0				Yes	4 times or less per year	6	6	6	6	6	6	6	5	5	6	4	5	5	5	4	4	2	3	3	3	6	6	4	5	5	5	5	5	5	5	5	5	6	6	6	Female
2018-01-08 17:42:46	Yes	Yes	1	Yes	1	4 times or less per year	0	0				Yes	4 times or less per year	6	6	6	6	4	7	7	7	7	5	4	5	5	5	5	1	5	5	5	1	5	2	2	1	2	4	6	3	2	1	6	4	4	3	4	Prefer not to say
2018-01-08 17:45:34	Yes	Yes	1	Yes	1	4 times or less per year	0	0				Yes	4 times or less per year	5	5	5	5	5	5	4	4	4	4	3	3	3	3	3	4	2	4	3	2	4	3	3	3	2	4	5	5	5	5	4	4	4	3	4	Male
2018-01-08 17:46:57	Yes	Yes	1	Yes	1	4 times or less per year	0	0				Yes	4 times or less per year	7	7	7	7	7	7	7	7	7	7	5	5	5	5	5	5	1	1	1	5	5	5	5	4	5	5	5	5	5	6	6	6	6	6	6	Male
2018-01-08 17:53:45	Yes	Yes	1	Yes	1	12 times or more per year	0	1				Yes	4 times or less per year	7	7	7	6	6	7	7	7	7	6	5	4	3	3	5	1	5	4	5	1	5	1	2	6	4	5	5	5	5	6	2	5	5	1	5	Female
2018-01-08 18:07:49	Yes	Yes	1	Yes	1	4 times or less per year	0	0				Yes	4 times or less per year	7	7	7	7	7	7	5	7	7	7	5	5	5	5	5	5	2	1	3	5	6	6	6	6	3	5	5	5	4	5	5	6	6	4	5	Female
2018-01-08 18:23:16	Yes	Yes	1	Yes	1	12 times or more per year	0	1				Yes	4 times or less per year	6	7	6	5	5	6	6	6	6	5	4	5	5	5	4	5	2	2	2	4	4	2	5	2	2	4	5	5	3	3	3	5	5	2	3	Female
2018-01-08 18:23:39	Yes	Yes	1	Yes	1	5 to 11 times per year	1	0				Yes	4 times or less per year	6	6	6	6	6	7	7	7	7	7	4	5	5	5	5	5	1	1	3	5	4	3	3	5	2	5	5	5	3	2	5	3	3	6	3	Female
2018-01-08 18:31:05	Yes	Yes	1	Yes	1	5 to 11 times per year	1	0				Yes	4 times or less per year	5	6	5	6	6	6	5	5	5	6	4	4	5	4	4	4	5	2	4	5	6	6	6	6	2	5	5	5	4	5	6	6	6	6	6	Female
2018-01-08 18:33:37	Yes	Yes	1	Yes	1	5 to 11 times per year	1	0				Yes	4 times or less per year	7	7	7	7	7	7	7	7	7	7	5	5	5	5	5	3	2	5	5	5	6	2	6	4	3	4	3	5	5	5	6	4	4	1	6	Female
2018-01-08 18:44:40	Yes	Yes	1	Yes	1	4 times or less per year	0	0				Yes	4 times or less per year	5	5	5	5	5	6	6	5	6	6	4	4	4	4	4	3	2	3	3	2	5	2	5	6	2	5	5	5	2	3	5	4	3	1	3	Male
2018-01-08 18:56:53	Yes	Yes	1	Yes	1	4 times or less per year	0	0				Yes	4 times or less per year	5	5	6	5	6	5	5	6	5	5	4	4	4	4	4	4	3	4	4	3	4	5	5	5	5	5	4	4	5	5	5	5	4	5	5	Male
2018-01-08 19:19:05	Yes	Yes	1	Yes	1	5 to 11 times per year	1	0				Yes	4 times or less per year	6	6	7	6	7	5	3	4	6	7	3	5	4	4	5	5	1	1	4	5	6	1	4	2	1	6	6	5	4	4	2	2	2	2	4	Female
2018-01-08 19:24:36	Yes	No	0	Yes	1	5 to 11 times per year	1	0				Yes	4 times or less per year	4	4	4	4	3	7	6	6	4	5	5	5	5	5	5	4	2	1	1	1	5	4	4	2	1	5	2	5	1	5	5	6	5	6	5	Female
2018-01-08 19:27:08	Yes	Yes	1	Yes	1	5 to 11 times per year	1	0				NO	12 times or more per year	4	4	4	4	4	4	4	4	4	4	3	3	3	3	3	3	3	3	3	3	3	4	4	4	4	4	4	4	4	4	4	4	4	4	4	Male
2018-01-08 19:37:33	Yes	Yes	1	Yes	1	5 to 11 times per year	1	0				Yes	4 times or less per year	7	7	4	7	7	7	5	6	7	7	3	5	5	5	4	5	2	3	4	5	6	6	6	6	2	6	6	6	4	6	6	6	6	6	1	Female
2018-01-08 19:37:36	Yes	Yes	1	Yes	1	12 times or more per year	0	1				Yes	4 times or less per year	7	7	7	7	7	7	7	7	7	7	5	5	5	5	5	4	2	1	3	4	6	6	6	5	5	6	6	5	4	4	5	6	6	1	5	Male
2018-01-08 19:53:33	Yes	Yes	1	Yes	1	12 times or more per year	0	1				Yes	5 to 11 times per year	2	4	3	4	4	3	5	5	5	3	4	3	4	2	3	3	2	4	3	2	2	2	3	3	5	2	3	3	3	5	3	3	3	5	3	Female
2018-01-08 19:58:43	Yes	No	0	Yes	1	4 times or less per year	0	0				Yes	4 times or less per year	2	2	3	3	2	4	4	4	3	4	1	3	3	3	3	2	4	4	3	2	5	2	5	5	3	5	4	6	5	5	4	5	5	3	5	Male
2018-01-08 20:24:11	Yes	No	0	Yes	1	12 times or more per year	0	1				Yes	4 times or less per year	3	4	3	4	2	2	1	2	2	2	1	3	1	1	2	3	4	2	3	4	6	2	6	4	2	5	6	5	4	3	4	6	6	3	5	Male
2018-01-08 20:24:29	Yes	No	0	Yes	1	12 times or more per year	0	1				Yes	4 times or less per year	3	4	3	4	2	2	1	2	2	2	1	3	1	1	2	3	4	2	3	4	6	2	6	4	2	5	6	5	4	3	4	6	6	3	5	Male
2018-01-08 20:56:00	Yes	Yes	1	Yes	1	12 times or more per year	0	1				Yes	4 times or less per year	7	7	7	7	6	7	7	7	7	7	5	5	5	5	5	5	3	1	1	5	3	2	1	3	1	1	2	1	2	2	3	3	2	1	1	Female
2018-01-08 21:35:23	Yes	Yes	1	Yes	1	5 to 11 times per year	1	0				Yes	4 times or less per year	6	5	6	6	6	7	7	5	7	7	5	5	4	4	5	4	2	2	4	4	5	4	5	4	3	5	5	5	2	2	4	6	5	3	5	Female
2018-01-08 21:51:42	Yes	Yes	1	Yes	1	5 to 11 times per year	1	0				Yes	4 times or less per year	6	6	6	6	6	6	6	6	6	6	4	5	5	4	5	3	4	4	4	5	5	3	6	5	5	6	6	6	5	4	5	6	6	2	5	Female
2018-01-08 22:01:36	Yes	Yes	1	Yes	1	4 times or less per year	0	0				Yes	4 times or less per year	7	7	7	7	6	6	6	6	6	6	5	5	5	5	5	5	2	2	2	5	5	5	4	5	3	5	5	5	5	5	5	5	5	3	2	Female
2018-01-08 22:06:52	Yes	Yes	1	Yes	1	5 to 11 times per year	1	0				Yes	4 times or less per year	5	5	6	5	7	7	5	7	6	5	4	4	3	4	5	4	2	2	2	4	5	5	5	2	5	4	6	4	2	4	4	5	5	2	5	Male
2018-01-08 22:07:05	Yes	Yes	1	Yes	1	4 times or less per year	0	0				Yes	4 times or less per year	7	7	7	7	5	7	7	7	7	7	4	5	5	5	5	3	4	2	5	3	6	3	3	5	4	5	2	6	4	4	6	4	4	1	4	Female
2018-01-08 23:09:37	Yes	Yes	1	Yes	1	12 times or more per year	0	1				Yes	4 times or less per year	5	5	5	5	5	7	5	7	7	7	5	5	5	5	5	3	4	4	3	3	5	3	5	4	1	5	5	4	3	3	4	4	4	3	5	Female
2018-01-08 23:17:57	Yes	Yes	1	Yes	1	5 to 11 times per year	1	0				Yes	4 times or less per year	5	4	5	5	4	5	4	4	5	4	2	3	3	4	2	3	3	4	4	3	5	5	4	5	4	4	5	4	5	5	4	4	5	4	4	Female
2018-01-08 23:28:53	Yes	No	0	Yes	1	4 times or less per year	0	0				Yes	4 times or less per year	5	5	6	4	4	5	6	6	7	6	4	4	4	5	5	5	1	1	1	5	4	5	5	5	1	5	6	5	1	1	4	5	5	1	1	Female
2018-01-08 23:30:52	Yes	Yes	1	Yes	1	4 times or less per year	0	0				NO	4 times or less per year	4	5	5	5	4	5	6	6	6	6	2	3	4	3	4	4	2	2	3	5	2	3	4	5	3	5	6	3	3	2	4	5	5	5	2	Male
2018-01-08 23:33:19	Yes	Yes	1	Yes	1	4 times or less per year	0	0				NO	4 times or less per year	4	5	5	5	4	5	6	6	6	6	2	3	4	3	4	4	2	2	3	5	2	3	4	5	3	5	6	3	3	2	4	5	5	5	2	Male
2018-01-09 00:13:29	Yes	Yes	1	Yes	1	5 to 11 times per year	1	0				Yes	5 to 11 times per year	7	5	7	6	7	6	6	7	5	5	5	4	5	4	4	5	3	4	4	5	5	6	5	5	5	4	6	5	5	4	6	6	5	4	4	Male
2018-01-09 00:15:54	Yes	Yes	1	Yes	1	12 times or more per year	0	1				Yes	12 times or more per year	6	7	6	7	5	7	5	7	6	7	3	4	5	4	3	5	4	2	3	3	2	2	6	2	2	2	5	6	5	6	2	5	6	5	2	Male
2018-01-09 00:19:14	Yes	Yes	1	Yes	1	5 to 11 times per year	1	0				Yes	5 to 11 times per year	6	6	7	7	6	7	6	6	4	6	4	5	3	5	5	5	4	5	2	5	2	3	6	6	4	4	6	4	6	6	6	4	6	6	2	Male
2018-01-24 11:42:56	No			No	0		0	0				Yes																																					Female
2018-01-24 11:45:39	Yes	Yes	1	Yes	1	5 to 11 times per year	1	0				Yes	4 times or less per year	6	7	7	6	5	7	7	5	7	6	5	5	5	4	5	1	4	5	5	1	4	5	6	4	1	4	3	5	5	6	5	5	6	5	4	Male
2018-01-24 11:49:03	Yes	Yes	1	Yes	1	5 to 11 times per year	1	0				Yes	4 times or less per year	7	7	7	7	7	7	7	7	7	7	5	5	5	5	5	1	5	1	2	1	4	4	4	2	4	2	4	1	1	5	5	5	5	1	3	Male
2018-01-24 11:49:11	Yes	Yes	1	Yes	1	4 times or less per year	0	0				Yes	4 times or less per year	4	5	5	5	5	6	6	6	6	4	4	5	4	4	5	4	4	1	4	5	6	6	6	4	6	6	6	6	4	6	6	6	6	3	6	Female
2018-01-24 11:49:14	Yes	Yes	1	Yes	1	12 times or more per year	0	1				Yes	4 times or less per year	7	7	7	7	7	7	7	7	7	7	5	5	5	5	5	1	5	4	4	1	6	1	6	2	1	6	6	5	4	6	1	6	6	3	6	Female
2018-01-24 11:51:42	Yes	Yes	1	Yes	1	5 to 11 times per year	1	0				Yes	4 times or less per year	7	7	7	7	7	7	7	7	7	7	4	5	5	5	5	5	5	1	1	5	5	5	6	5	2	5	4	5	4	5	2	6	6	5	6	Female
2018-01-24 11:53:04	Yes	No	0	Yes	1	4 times or less per year	0	0				Yes	4 times or less per year	1	1	1	4	2	5	4	4	4	1	1	3	4	4	5	4	1	1	4	5	5	3	5	6	2	3	5	6	4	4	5	5	5	2	5	Male
2018-01-24 11:53:28	Yes	Yes	1	Yes	1	12 times or more per year	0	1				Yes	4 times or less per year	7	7	7	4	4	7	7	7	7	7	5	5	5	5	5	4	1	1	4	5	5	2	5	5	2	5	6	6	5	4	2	5	5	6	5	Female
2018-01-24 11:54:18	No			No	0		0	0				Yes																																					Male
2018-01-24 11:55:34	Yes	Yes	1	Yes	1	12 times or more per year	0	1				Yes	4 times or less per year	6	7	6	6	7	7	7	7	6	7	4	5	4	4	4	4	3	1	2	3	5	5	6	3	4	5	4	3	2	5	4	6	6	4	5	Female
2018-01-24 11:58:59	Yes	Yes	1	Yes	1	5 to 11 times per year	1	0				Yes	4 times or less per year	7	7	7	7	7	7	7	7	7	7	5	5	5	5	5	4	5	3	4	4	6	4	6	5	3	5	6	5	1	4	5	6	6	4	5	Male
2018-01-24 11:59:59	Yes	Yes	1	Yes	1	12 times or more per year	0	1				Yes	4 times or less per year	7	7	7	7	6	4	4	6	7	4	5	5	5	5	5	4	3	1	3	3	5	3	2	1	4	4	5	6	4	5	4	2	2	5	4	Female
2018-01-24 12:02:07	Yes	Yes	1	Yes	1	4 times or less per year	0	0				Yes	4 times or less per year	7	7	7	7	7	7	7	7	7	7	5	5	5	5	5	4	1	1	2	4	3	5	5	4	5	4	6	5	5	3	5	5	5	4	3	Female
2018-01-24 12:02:49	Yes	Yes	1	Yes	1	5 to 11 times per year	1	0				Yes	4 times or less per year	7	7	7	7	7	7	6	6	7	7	5	5	5	5	5	5	2	1	5	4	5	5	5	1	5	5	5	2	1	2	5	5	5	5	4	Female
2018-01-24 12:58:04	Yes	No	0	Yes	1	4 times or less per year	0	0				Yes	4 times or less per year	7	7	7	7	5	7	7	7	7	7	5	5	5	2	5	3	1	1	1	4	5	4	6	4	3	5	5	4	2	5	4	5	5	2	5	Female
2018-01-24 13:10:33	Yes	No	0	Yes	1	4 times or less per year	0	0				Yes	4 times or less per year	4	4	2	3	3	5	5	5	5	5	3	4	4	3	4	4	3	2	2	4	4	4	5	4	5	4	4	4	5	4	4	4	5	4	5	Male
2018-01-24 13:19:06	Yes	No	0	Yes	1	5 to 11 times per year	1	0				Yes	4 times or less per year	4	4	5	5	3	5	5	6	6	6	3	4	3	4	4	3	4	4	5	4	5	6	5	6	5	6	5	6	5	5	6	5	5	5	5	Female
2018-01-24 13:20:10	Yes	Yes	1	Yes	1	12 times or more per year	0	1				Yes	5 to 11 times per year	6	6	5	6	7	7	6	6	7	6	4	4	5	4	5	5	2	1	2	4	3	2	6	3	4	5	6	4	3	4	4	6	5	2	4	Female
2018-01-24 13:21:01	Yes	Yes	1	Yes	1	12 times or more per year	0	1				Yes	5 to 11 times per year	5	5	6	5	5	5	6	6	6	6	5	4	5	4	4	4	4	2	2	5	4	3	5	6	5	5	5	4	1	3	4	6	6	5	2	Male
2018-01-24 13:35:52	Yes	Yes	1	Yes	1	5 to 11 times per year	1	0				Yes	4 times or less per year	7	7	7	4	4	7	6	6	7	7	4	5	5	5	5	3	4	3	3	4	3	2	5	2	1	4	2	3	1	2	2	4	4	2	3	Female
2018-01-24 13:40:18	Yes	No	0	Yes	1	12 times or more per year	0	1				Yes	4 times or less per year	5	3	3	2	3	5	4	3	5	5	5	5	5	2	5	4	2	2	4	5	5	5	4	5	5	4	5	2	2	5	4	4	4	4	4	Female
2018-01-24 13:42:21	Yes	Yes	1	Yes	1	12 times or more per year	0	1				Yes	4 times or less per year	6	6	6	6	6	6	6	6	6	6	5	5	5	5	5	4	5	4	4	4	5	4	5	4	4	5	4	5	4	5	5	5	5	4	5	Male
2018-01-24 13:42:54	Yes	Yes	1	Yes	1	5 to 11 times per year	1	0				Yes	5 to 11 times per year	6	6	6	7	6	7	6	7	6	6	5	4	4	5	5	4	5	4	4	3	5	5	5	5	5	6	6	6	5	5	2	5	6	5	4	Female
2018-01-24 13:45:09	No			No	0		0	0				Yes																																					Male
2018-01-24 14:06:28	Yes	Yes	1	Yes	1	4 times or less per year	0	0				Yes	4 times or less per year	7	7	7	7	5	7	7	7	7	7	5	5	5	3	5	1	4	4	5	1	2	2	2	4	2	2	3	1	1	4	2	3	3	2	2	Female
2018-01-24 14:13:13	Yes	No	0	Yes	1	5 to 11 times per year	1	0				Yes	4 times or less per year	1	1	1	1	1	4	4	4	1	1	1	5	5	5	5	5	1	2	5	5	6	5	6	6	5	6	5	6	6	3	5	6	6	5	6	Female
2018-01-24 14:28:08	No			No	0		0	0				Yes																																					Female
2018-01-24 14:30:38	Yes	Yes	1	Yes	1	4 times or less per year	0	0				Yes	4 times or less per year	7	7	6	7	7	7	7	7	7	7	5	5	5	5	5	4	3	4	5	5	5	5	5	6	3	5	6	6	6	3	4	6	3	4	6	Female
2018-01-24 14:47:48	Yes	No	0	Yes	1	5 to 11 times per year	1	0				Yes	4 times or less per year	3	4	4	4	3	6	5	5	4	4	4	5	5	4	5	4	3	1	2	4	5	4	6	3	3	4	5	4	2	4	4	5	5	5	5	Male
2018-01-24 15:37:28	Yes	No	0	Yes	1	4 times or less per year	0	0				Yes	4 times or less per year	5	4	4	4	3	5	5	5	5	5	5	4	4	4	4	2	1	2	3	4	5	5	5	3	2	4	5	4	2	3	4	5	5	6	4	Female
2018-01-24 16:05:00	Yes	Yes	1	Yes	1	5 to 11 times per year	1	0				Yes	4 times or less per year	7	7	7	7	7	7	7	7	7	7	5	5	5	5	5	5	1	1	1	5	5	5	5	3	1	5	6	4	1	6	5	5	5	4	5	Female
2018-01-24 16:11:31	Yes	Yes	1	Yes	1	12 times or more per year	0	1				Yes	4 times or less per year	7	7	7	7	7	7	7	7	7	7	5	5	5	5	5	5	1	1	1	5	4	5	1	1	1	1	6	4	1	1	4	1	6	5	4	Female
2018-01-24 16:16:14	Yes	No	0	Yes	1	5 to 11 times per year	1	0				Yes	4 times or less per year	1	1	1	1	1	2	1	1	1	1	5	5	5	5	5	3	1	1	1	4	3	3	4	3	1	3	3	2	3	2	2	4	4	4	4	Female
2018-01-24 16:46:12	Yes	Yes	1	Yes	1	12 times or more per year	0	1				Yes	4 times or less per year	6	6	6	5	6	7	7	7	7	6	5	4	4	4	5	5	4	2	3	4	5	3	5	4	3	4	5	4	3	3	4	5	5	4	4	Female
2018-01-24 17:03:37	Yes	Yes	1	Yes	1	4 times or less per year	0	0				Yes	4 times or less per year	7	7	7	7	7	7	7	7	7	7	5	5	5	5	5	3	5	5	5	3	6	6	4	6	5	6	5	5	4	6	6	5	4	6	6	Male
2018-01-24 17:23:26	Yes	Yes	1	Yes	1	5 to 11 times per year	1	0				Yes	4 times or less per year	6	6	6	6	6	7	7	6	7	7	4	4	5	5	5	2	4	2	4	1	5	5	5	4	3	5	4	4	3	4	5	5	5	5	5	Female
2018-01-24 18:02:43	Yes	Yes	1	Yes	1	4 times or less per year	0	0				Yes	4 times or less per year	7	7	7	7	6	6	7	7	6	7	5	5	5	5	5	4	1	1	2	4	3	5	4	5	4	4	6	6	6	5	4	4	4	1	4	Female
2018-01-24 18:07:29	Yes	Yes	1	Yes	1	4 times or less per year	0	0				Yes	4 times or less per year	5	5	5	5	5	6	6	5	6	6	3	4	4	4	4	2	5	4	2	5	2	2	1	6	2	3	3	2	1	2	4	2	2	2	2	Male
2018-01-24 19:29:38	Yes	Yes	1	Yes	1	12 times or more per year	0	1				Yes	4 times or less per year	7	7	7	7	7	7	7	7	7	7	5	5	5	5	5	5	1	1	3	5	6	6	6	4	4	6	6	6	3	6	5	6	6	5	6	Male
2018-01-24 19:43:26	Yes	No	0	Yes	1	4 times or less per year	0	0				Yes	4 times or less per year	2	2	1	3	2	5	5	6	4	4	5	3	3	3	4	5	1	1	2	4	4	4	5	3	4	4	5	4	5	4	5	5	5	5	4	Female
2018-01-24 20:40:52	Yes	Yes	1	Yes	1	5 to 11 times per year	1	0				Yes	4 times or less per year	7	7	7	7	6	6	6	5	6	6	5	5	5	4	5	4	2	3	4	4	5	5	5	5	4	5	5	4	4	4	4	5	5	4	5	Female
2018-01-24 23:57:03	Yes	No	0	Yes	1	4 times or less per year	0	0				Yes	4 times or less per year	1	1	1	1	1	4	4	3	2	2	1	5	5	5	5	1	5	2	5	1	6	6	6	6	4	6	4	5	5	6	6	6	6	5	6	Female
2018-01-25 00:54:35	Yes	No	0	Yes	1	5 to 11 times per year	1	0				Yes	4 times or less per year	1	1	1	2	1	5	2	4	4	2	3	4	3	3	4	5	2	3	2	3	5	4	4	5	2	5	6	5	3	4	5	4	4	4	5	Female
2018-01-25 08:24:14	Yes	Yes	1	Yes	1	5 to 11 times per year	1	0				Yes	4 times or less per year	6	5	5	5	5	3	3	7	3	3	4	2	2	2	5	5	2	1	2	5	5	3	3	3	1	2	5	4	2	2	2	3	3	4	3	Male
2018-01-25 11:15:29	Yes	Yes	1	Yes	1	5 to 11 times per year	1	0				Yes	4 times or less per year	6	6	6	4	5	6	6	6	6	6	5	5	4	4	4	4	2	2	4	5	6	5	5	6	1	6	6	6	5	5	6	4	4	5	5	Female
2018-01-25 11:29:15	Yes	No	0	Yes	1	5 to 11 times per year	1	0				Yes	5 to 11 times per year	2	4	2	2	2	3	3	3	2	2	3	4	1	1	4	4	3	2	3	3	4	3	3	5	3	4	4	3	3	5	5	4	3	2	5	Female
2018-01-25 11:41:18	Yes	No	0	Yes	1	12 times or more per year	0	1				Yes	5 to 11 times per year	1	1	1	1	1	3	2	3	2	2	1	3	1	1	1	3	1	1	1	3	1	1	4	4	1	5	4	4	3	2	5	5	5	3	5	Female
2018-01-25 11:48:54	Yes	Yes	1	Yes	1	12 times or more per year	0	1				Yes	4 times or less per year	5	5	5	5	5	5	5	6	6	6	4	4	4	4	4	4	3	3	3	4	4	4	5	4	5	4	5	4	4	4	4	4	4	3	4	Male
2018-01-25 11:55:58	Yes	No	0	Yes	1	5 to 11 times per year	1	0				Yes	4 times or less per year	3	3	3	3	3	5	4	4	3	3	4	3	1	1	3	4	3	1	3	3	4	3	2	3	2	4	5	3	4	5	4	4	2	2	4	Female
2018-01-25 13:02:55	No			No	0		0	0				Yes																																					Female
2018-01-25 15:22:54	Yes	Yes	1	Yes	1	12 times or more per year	0	1				Yes	4 times or less per year	7	7	7	7	7	7	7	7	7	7	5	5	5	5	5	4	1	2	4	5	5	6	6	6	6	6	5	6	6	6	6	6	6	5	6	Female
2018-01-25 16:50:46	No			No	0		0	0				Yes																																					Female
2018-01-25 18:35:45	Yes	No	0	Yes	1	12 times or more per year	0	1				Yes	4 times or less per year	1	1	1	2	1	4	4	3	2	2	1	1	3	3	1	4	1	1	3	5	3	3	4	4	2	4	2	5	3	4	4	4	4	6	3	Female
2018-01-25 19:34:20	Yes	Yes	1	Yes	1	12 times or more per year	0	1				Yes	4 times or less per year	6	5	6	5	6	7	6	6	7	7	5	5	4	4	5	5	2	2	2	5	4	4	5	3	3	4	5	5	4	5	5	5	3	3	5	Female
2018-01-25 20:56:42	Yes	Yes	1	Yes	1	12 times or more per year	0	1				Yes	4 times or less per year	6	6	6	6	4	6	6	6	6	6	4	5	4	4	5	3	2	3	3	4	6	6	6	5	5	6	6	6	5	4	6	4	4	2	5	Female
2018-01-25 22:00:43	Yes	Yes	1	Yes	1	4 times or less per year	0	0				Yes	4 times or less per year	4	6	7	7	4	7	7	4	4	7	4	5	5	5	5	1	1	1	2	1	4	5	1	1	4	1	4	5	5	2	6	1	1	2	3	Female
2018-01-25 22:43:52	Yes	Yes	1	Yes	1	12 times or more per year	0	1				Yes	4 times or less per year	7	7	7	7	7	7	7	7	7	7	5	5	5	5	5	5	1	1	1	5	4	4	5	4	2	3	3	2	1	4	4	5	5	4	4	Female
2018-01-26 06:36:15	Yes	No	0	Yes	1	4 times or less per year	0	0				Yes	4 times or less per year	4	3	4	3	3	2	2	3	2	3	3	1	5	1	4	4	2	1	4	4	5	2	3	5	2	4	3	2	2	2	3	3	3	5	4	Female
2018-01-26 09:41:27	Yes	Yes	1	Yes	1	12 times or more per year	0	1				Yes	5 to 11 times per year	5	5	4	4	5	5	4	5	5	5	4	4	4	3	4	4	1	1	1	5	4	5	5	4	3	4	3	3	3	4	5	4	5	4	5	Female
2018-01-26 13:19:41	Yes	Yes	1	Yes	1	4 times or less per year	0	0				Yes	4 times or less per year	6	6	6	6	6	7	7	6	6	6	4	5	4	4	5	2	2	2	4	3	3	2	4	6	4	5	5	5	1	4	2	6	6	1	5	Male
2018-01-26 13:55:02	Yes	Yes	1	Yes	1	5 to 11 times per year	1	0				Yes	4 times or less per year	7	7	7	7	7	7	7	7	7	7	5	5	5	5	5	1	1	1	4	3	5	5	6	5	5	5	6	5	4	5	5	5	5	5	5	Female
2018-01-26 17:53:00	Yes	Yes	1	Yes	1	5 to 11 times per year	1	0				Yes	4 times or less per year	6	6	6	6	6	7	7	6	6	6	5	4	5	5	5	4	3	1	3	3	4	4	5	4	4	4	4	4	4	4	4	5	5	5	4	Female
2018-01-26 19:18:05	Yes	Yes	1	Yes	1	12 times or more per year	0	1				Yes	4 times or less per year	6	6	6	5	6	6	6	6	7	6	5	4	4	4	5	4	3	2	3	4	4	4	5	4	3	5	4	3	3	3	4	5	5	3	5	Female
2018-01-26 19:48:22	Yes	Yes	1	Yes	1	12 times or more per year	0	1				Yes	4 times or less per year	7	7	7	7	7	7	7	7	7	7	5	5	5	5	5	2	1	2	3	3	6	4	6	6	3	6	6	3	3	6	6	6	6	2	6	Female
2018-01-26 19:51:48	Yes	No	0	Yes	1	12 times or more per year	0	1				Yes	4 times or less per year	1	1	1	1	1	4	4	5	5	5	4	4	3	4	4	4	2	2	2	4	4	5	5	2	2	4	4	4	3	3	4	4	4	4	4	Male
2018-01-26 19:54:21	Yes	No	0	Yes	1	5 to 11 times per year	1	0				Yes	5 to 11 times per year	4	4	4	4	4	5	5	5	5	4	3	4	4	4	3	2	5	4	3	4	2	4	4	3	4	5	4	4	4	5	4	5	5	4	4	Male
2018-01-26 19:56:54	Yes	Yes	1	Yes	1	4 times or less per year	0	0				Yes	4 times or less per year	5	5	4	4	4	7	6	6	6	6	4	5	5	5	5	4	1	1	1	5	5	4	6	2	4	4	5	4	1	4	5	5	6	4	5	Male
2018-01-26 19:57:15	Yes	No	0	Yes	1	5 to 11 times per year	1	0				Yes	4 times or less per year	4	4	7	4	5	5	6	5	7	3	3	4	5	2	3	3	5	3	1	5	6	6	4	6	6	6	6	6	6	6	6	6	6	4	6	Male
2018-01-26 19:57:30	Yes	Yes	1	Yes	1	4 times or less per year	0	0				Yes	4 times or less per year	7	7	7	7	7	7	7	7	7	7	5	5	5	5	5	1	5	5	5	1	6	6	6	6	6	6	6	6	6	1	3	6	6	1	6	Male
2018-01-26 19:57:55	Yes	Yes	1	Yes	1	12 times or more per year	0	1				Yes	4 times or less per year	6	6	6	6	6	6	6	6	6	6	4	5	5	5	5	3	1	2	3	3	5	5	4	4	2	4	4	3	3	4	5	4	4	2	3	Female
2018-01-26 19:58:32	Yes	No	0	Yes	1	12 times or more per year	0	1				Yes	4 times or less per year	4	4	4	2	2	6	5	6	6	4	5	5	5	5	5	5	1	1	3	3	6	6	6	6	2	6	6	6	6	6	6	6	6	3	6	Female
2018-01-26 20:00:37	Yes	Yes	1	Yes	1	4 times or less per year	0	0				Yes	4 times or less per year	7	7	7	7	7	7	7	7	7	7	5	5	5	5	5	5	1	3	3	5	3	3	3	3	3	3	3	3	3	3	3	3	3	3	3	Male
2018-01-26 20:00:50	Yes	Yes	1	Yes	1	12 times or more per year	0	1				Yes	4 times or less per year	7	7	7	7	7	7	7	7	7	6	5	4	4	5	5	3	3	2	4	2	6	6	6	6	3	4	6	6	6	6	6	5	5	2	5	Female
2018-01-26 20:01:57	Yes	Yes	1	Yes	1	4 times or less per year	0	0				Yes	4 times or less per year	7	7	7	7	7	5	5	5	7	7	5	5	5	4	5	5	1	1	1	5	4	1	4	1	1	4	4	4	1	4	1	4	4	1	4	Male
2018-01-26 20:01:57	Yes	No	0	Yes	1	5 to 11 times per year	1	0				Yes	4 times or less per year	5	5	4	4	5	6	6	6	6	6	5	4	4	4	4	4	2	3	3	3	3	5	4	5	3	4	5	4	4	3	5	4	4	2	4	Female
2018-01-26 20:04:04	Yes	No	0	Yes	1	4 times or less per year	0	0				Yes	4 times or less per year	2	2	2	2	2	4	4	4	4	4	3	4	3	4	4	3	4	3	2	2	2	2	3	2	2	4	4	3	2	2	2	3	4	4	3	Female
2018-01-26 20:04:11	Yes	Yes	1	Yes	1	12 times or more per year	0	1				Yes	4 times or less per year	7	7	7	7	6	7	7	7	7	7	5	5	5	5	5	4	5	1	2	5	5	1	4	5	2	5	5	5	4	1	1	5	4	6	4	Female
2018-01-26 20:04:32	Yes	No	0	Yes	1	4 times or less per year	0	0				Yes	4 times or less per year	3	2	3	4	2	6	5	6	6	5	1	4	4	4	5	4	2	1	2	4	6	6	6	6	1	6	5	5	2	3	5	5	5	1	6	Female
2018-01-26 20:05:38	Yes	No	0	Yes	1	4 times or less per year	0	0				Yes	4 times or less per year	2	2	2	4	4	5	5	5	5	4	3	3	3	3	3	4	3	2	2	2	4	3	3	2	3	4	2	3	3	4	4	3	3	4	3	Female
2018-01-26 20:06:11	Yes	Yes	1	Yes	1	12 times or more per year	0	1				Yes	4 times or less per year	7	7	7	7	7	7	7	7	7	7	5	4	5	5	4	5	5	5	4	5	6	4	6	6	5	6	6	6	5	6	5	6	6	6	6	Female
2018-01-26 20:12:31	No			No	0		0	0				Yes																																					Female
2018-01-26 20:13:27	Yes	No	0	Yes	1	5 to 11 times per year	1	0				Yes	4 times or less per year	4	3	3	3	3	5	4	4	5	6	4	4	3	3	5	4	2	2	3	4	5	6	4	4	3	5	5	4	3	5	6	4	4	1	5	Female
2018-01-26 20:17:18	Yes	Yes	1	Yes	1	4 times or less per year	0	0				Yes	4 times or less per year	7	7	7	7	7	7	7	7	7	7	5	5	5	5	5	4	5	4	4	5	6	6	6	5	5	6	2	4	4	5	6	6	6	3	5	Male
2018-01-26 20:22:13	Yes	Yes	1	Yes	1	12 times or more per year	0	1				Yes	4 times or less per year	7	7	7	7	7	7	7	7	7	7	5	5	5	5	5	5	3	3	2	5	5	5	6	5	3	5	5	4	4	4	5	5	5	2	4	Female
2018-01-26 20:23:06	Yes	Yes	1	Yes	1	4 times or less per year	0	0				Yes	4 times or less per year	7	7	7	7	6	6	5	6	6	6	5	5	5	5	5	4	1	1	1	5	5	1	5	4	4	6	5	4	2	5	2	6	6	2	4	Female
2018-01-26 20:24:58	No			No	0		0	0				Yes																																					Male
2018-01-26 20:31:10	Yes	Yes	1	Yes	1	5 to 11 times per year	1	0				Yes	4 times or less per year	6	5	6	6	6	7	5	7	7	7	5	5	5	5	5	3	4	2	4	2	5	4	5	5	4	5	3	3	2	3	4	5	5	2	4	Female
2018-01-26 20:32:13	Yes	No	0	Yes	1	12 times or more per year	0	1				Yes	4 times or less per year	3	3	2	2	1	5	2	4	2	1	4	5	3	2	5	4	2	2	4	4	3	4	2	5	2	4	2	4	2	2	6	3	4	1	4	Female
2018-01-26 20:32:44	Yes	No	0	Yes	1	5 to 11 times per year	1	0				Yes	4 times or less per year	3	3	3	3	3	4	4	4	4	3	4	5	5	5	5	5	2	2	4	4	5	5	5	6	4	5	3	6	3	5	5	5	6	3	6	Female
2018-01-26 20:34:00	Yes	No	0	Yes	1	4 times or less per year	0	0				Yes	4 times or less per year	4	4	4	4	3	3	3	2	4	3	2	5	3	3	5	5	3	2	4	4	5	4	4	4	2	4	4	2	2	3	4	4	4	3	4	Male
2018-01-26 20:34:08	Yes	No	0	Yes	1	4 times or less per year	0	0				Yes	4 times or less per year	4	3	4	3	3	4	3	2	3	3	3	4	3	2	4	5	3	1	2	5	4	3	2	2	2	4	2	5	1	1	2	2	3	2	5	Female
2018-01-26 20:34:25	Yes	Yes	1	Yes	1	5 to 11 times per year	1	0				Yes	4 times or less per year	6	6	6	6	6	6	7	7	7	6	5	5	5	5	5	5	1	1	3	5	5	5	5	4	5	5	3	3	4	5	5	5	6	3	6	Female
2018-01-26 20:34:56	Yes	Yes	1	Yes	1	4 times or less per year	0	0				Yes	4 times or less per year	7	7	7	7	7	7	7	7	7	7	4	5	5	5	5	4	4	3	3	3	4	4	5	5	4	4	5	3	3	4	4	5	5	2	4	Female
2018-01-26 20:43:49	Yes	Yes	1	Yes	1	12 times or more per year	0	1				Yes	4 times or less per year	6	6	6	6	5	6	6	7	7	7	5	3	4	4	4	5	1	3	4	3	6	3	5	6	5	6	2	3	4	5	3	4	4	2	5	Female
2018-01-26 20:44:21	Yes	Yes	1	Yes	1	4 times or less per year	0	0				Yes	4 times or less per year	7	7	7	7	7	7	7	7	7	7	5	5	5	5	5	3	4	3	4	2	5	4	3	4	4	3	4	4	4	2	3	4	2	1	5	Male
2018-01-26 20:44:57	Yes	Yes	1	Yes	1	12 times or more per year	0	1				Yes	12 times or more per year	6	7	7	6	6	6	7	7	7	6	5	5	5	5	5	1	2	5	2	2	6	6	1	1	2	2	1	6	5	5	5	5	6	6	6	Male
2018-01-26 20:45:20	Yes	Yes	1	Yes	1	4 times or less per year	0	0				Yes	4 times or less per year	6	6	6	6	6	4	1	4	4	5	1	4	4	5	5	1	3	2	4	4	5	2	5	2	1	2	3	3	1	3	5	6	6	5	5	Female
2018-01-26 20:47:47	Yes	No	0	Yes	1	4 times or less per year	0	0				Yes	4 times or less per year	5	5	5	4	5	7	7	6	7	7	5	3	4	5	5	5	1	1	1	5	5	5	6	4	5	5	5	5	3	4	4	6	6	2	6	Female
2018-01-26 20:48:47	Yes	Yes	1	Yes	1	12 times or more per year	0	1				Yes	4 times or less per year	5	5	5	5	4	6	6	6	5	5	3	4	4	4	5	3	1	1	2	5	5	5	5	4	2	4	5	4	2	3	4	4	4	1	3	Male
2018-01-26 20:50:55	Yes	Yes	1	Yes	1	5 to 11 times per year	1	0				Yes	4 times or less per year	6	6	6	6	5	7	7	7	7	7	4	5	5	5	5	3	4	4	3	3	5	3	5	3	2	3	5	4	3	3	5	5	4	2	3	Male
2018-01-26 20:52:28	Yes	Yes	1	Yes	1	12 times or more per year	0	1				Yes	4 times or less per year	7	7	7	7	7	7	7	7	7	7	5	5	5	5	5	5	3	3	5	5	6	4	6	6	4	5	6	6	4	3	6	6	6	6	5	Female
2018-01-26 20:52:57	Yes	Yes	1	Yes	1	12 times or more per year	0	1				Yes	4 times or less per year	6	6	7	6	6	5	5	5	5	5	4	4	3	3	4	5	1	2	1	4	4	5	5	2	1	4	5	3	1	3	5	5	5	5	4	Male
2018-01-26 20:53:15	Yes	Yes	1	Yes	1	5 to 11 times per year	1	0				Yes	4 times or less per year	7	7	6	7	6	7	6	7	7	7	4	4	4	5	5	3	2	3	4	4	6	5	6	5	5	5	6	5	4	4	5	5	3	2	5	Male
2018-01-26 20:53:22	Yes	Yes	1	Yes	1	5 to 11 times per year	1	0				Yes	4 times or less per year	7	7	7	7	7	7	7	6	6	7	5	5	5	4	5	4	1	2	1	4	3	5	4	4	1	2	5	4	4	5	4	5	5	1	4	Female
2018-01-26 20:54:28	Yes	No	0	Yes	1	12 times or more per year	0	1				Yes	4 times or less per year	5	6	5	6	4	2	3	3	3	3	5	5	5	5	5	5	1	1	1	4	4	4	5	3	4	4	6	4	3	2	4	5	5	5	2	Female
2018-01-26 20:55:11	Yes	Yes	1	Yes	1	12 times or more per year	0	1				Yes	4 times or less per year	7	7	7	7	7	7	7	7	7	7	5	5	5	5	5	5	3	3	5	5	5	4	6	6	5	5	6	6	5	4	6	6	6	4	5	Female
2018-01-26 20:57:54	Yes	Yes	1	Yes	1	4 times or less per year	0	0				Yes	4 times or less per year	6	6	6	5	6	5	6	6	5	6	4	4	5	4	5	3	4	3	4	3	3	5	4	4	5	6	5	6	4	5	4	4	5	5	6	Male
2018-01-26 21:00:14	Yes	Yes	1	Yes	1	12 times or more per year	0	1				Yes	4 times or less per year	5	5	5	5	3	6	5	4	4	4	4	5	5	5	5	5	1	1	3	5	6	5	5	5	5	6	2	4	4	6	6	5	5	1	6	Female
2018-01-26 21:02:08	Yes	No	0	Yes	1	12 times or more per year	0	1				Yes	5 to 11 times per year	2	2	2	2	1	4	3	3	2	2	2	3	1	2	3	4	2	1	3	5	6	6	6	5	5	6	6	3	5	4	6	6	6	3	6	Male
2018-01-26 21:03:18	Yes	Yes	1	Yes	1	5 to 11 times per year	1	0				Yes	4 times or less per year	7	7	7	7	6	7	7	7	7	7	5	5	5	4	5	3	1	1	2	3	5	5	5	5	2	4	5	5	5	3	5	5	5	3	4	Female
2018-01-26 21:04:53	Yes	No	0	Yes	1	4 times or less per year	0	0				Yes	4 times or less per year	3	3	4	1	1	4	3	1	1	4	3	3	2	2	3	4	2	2	3	2	5	4	4	5	3	6	4	3	3	3	5	4	3	1	6	Female
2018-01-26 21:06:25	Yes	No	0	Yes	1	12 times or more per year	0	1				Yes	4 times or less per year	1	1	1	2	2	4	1	1	2	2	5	5	3	1	5	3	1	1	3	2	6	2	4	1	2	4	3	4	1	1	5	4	3	3	4	Female
2018-01-26 21:08:30	Yes	Yes	1	Yes	1	5 to 11 times per year	1	0				Yes	5 to 11 times per year	5	6	6	6	5	7	7	7	6	6	3	4	4	5	5	2	4	4	4	4	4	4	5	3	5	5	6	5	4	3	5	5	5	5	6	Male
2018-01-26 21:09:11	Yes	Yes	1	Yes	1	5 to 11 times per year	1	0				Yes	4 times or less per year	7	7	7	7	7	6	6	6	6	6	5	5	5	3	5	2	2	1	4	4	6	5	6	5	4	5	4	3	3	4	4	5	5	3	4	Female
2018-01-26 21:10:55	Yes	Yes	1	Yes	1	4 times or less per year	0	0				Yes	4 times or less per year	6	6	6	6	6	7	7	7	7	7	4	4	4	5	5	4	3	3	3	2	3	3	2	2	4	4	4	3	3	3	4	2	2	4	3	Female
2018-01-26 21:13:09	Yes	Yes	1	Yes	1	4 times or less per year	0	0				Yes	4 times or less per year	6	6	6	6	6	6	6	6	6	6	4	4	4	4	4	4	4	4	4	4	5	5	5	5	5	5	5	5	5	5	5	5	5	5	5	Female
2018-01-26 21:13:22	Yes	Yes	1	Yes	1	12 times or more per year	0	1				Yes	4 times or less per year	6	6	6	6	6	7	6	6	7	7	5	5	4	4	5	4	1	2	2	4	5	5	4	5	2	4	5	5	5	4	5	4	4	3	5	Female
2018-01-26 21:15:12	Yes	Yes	1	Yes	1	12 times or more per year	0	1				Yes	4 times or less per year	7	7	7	7	7	7	7	7	7	7	5	5	5	5	5	5	1	1	1	5	3	4	6	3	1	3	6	2	1	2	3	6	6	3	3	Female
2018-01-26 21:18:56	Yes	No	0	Yes	1	4 times or less per year	0	0				Yes	4 times or less per year	2	2	1	1	1	1	1	2	2	2	4	2	1	1	3	4	3	2	2	5	4	3	4	4	3	4	4	3	2	2	3	3	3	2	3	Female
2018-01-26 21:19:14	Yes	No	0	Yes	1	4 times or less per year	0	0				Yes	4 times or less per year	4	4	3	3	4	5	4	4	4	4	3	3	1	1	5	1	5	5	5	1	6	5	4	1	1	6	4	5	4	3	4	4	4	2	6	Female
2018-01-26 21:22:28	No			No	0		0	0				Yes																																					Female
2018-01-26 21:23:47	Yes	Yes	1	Yes	1	5 to 11 times per year	1	0				Yes	4 times or less per year	6	7	7	7	6	7	7	7	6	6	5	4	5	4	5	3	3	3	4	4	6	6	6	3	5	5	5	6	5	4	6	4	5	4	6	Female
2018-01-26 21:27:15	Yes	Yes	1	Yes	1	4 times or less per year	0	0				Yes	4 times or less per year	5	5	5	4	5	7	6	6	7	7	4	4	4	4	5	3	3	3	3	2	5	4	3	5	2	4	4	3	4	2	4	5	5	5	4	Female
2018-01-26 21:30:23	Yes	Yes	1	Yes	1	4 times or less per year	0	0				Yes	4 times or less per year	6	5	5	5	4	6	4	4	5	5	3	3	4	4	3	3	3	3	3	3	4	4	4	3	4	4	3	4	4	4	3	4	4	4	3	Female
2018-01-26 21:32:24	Yes	No	0	Yes	1	4 times or less per year	0	0				Yes	4 times or less per year	5	5	5	5	5	6	6	6	6	6	4	4	4	4	4	4	3	4	3	4	4	3	3	5	4	4	4	4	3	4	5	4	4	5	5	Female
2018-01-26 21:35:22	Yes	Yes	1	Yes	1	12 times or more per year	0	1				Yes	4 times or less per year	7	7	7	7	7	7	7	7	7	7	5	5	5	5	5	5	1	1	1	5	6	6	6	6	1	6	6	6	1	6	6	6	6	6	6	Female
2018-01-26 21:44:04	No			No	0		0	0				Yes																																					Female
2018-01-26 21:44:12	Yes	No	0	Yes	1	5 to 11 times per year	1	0				Yes	4 times or less per year	4	4	3	3	1	5	6	4	4	5	2	5	4	4	3	5	2	1	2	3	5	3	6	6	2	3	6	4	3	3	3	4	5	4	5	Female
2018-01-26 21:45:17	Yes	Yes	1	Yes	1	5 to 11 times per year	1	0				Yes	4 times or less per year	5	5	5	5	5	5	3	4	4	5	5	5	5	5	5	5	2	3	2	4	3	2	4	4	1	4	5	4	2	2	4	5	4	2	5	Male
2018-01-26 21:46:35	Yes	Yes	1	Yes	1	4 times or less per year	0	0				Yes	4 times or less per year	5	5	5	5	5	6	6	6	6	5	4	4	4	4	4	4	2	2	2	5	5	4	5	5	4	5	5	5	4	4	4	5	5	4	5	Female
2018-01-26 21:47:59	Yes	No	0	Yes	1	12 times or more per year	0	1				Yes	4 times or less per year	3	2	2	2	1	1	1	3	2	2	2	5	5	5	5	4	5	5	3	3	5	2	5	5	5	6	6	4	4	6	4	5	6	6	6	Female
2018-01-26 21:49:01	Yes	No	0	Yes	1	5 to 11 times per year	1	0				Yes	4 times or less per year	5	5	5	5	5	5	3	3	3	3	4	4	3	3	3	5	1	3	4	5	6	6	6	5	5	6	6	6	5	6	6	6	6	6	6	Female
2018-01-26 21:49:01	Yes	No	0	Yes	1	12 times or more per year	0	1				Yes	4 times or less per year	3	2	2	2	1	1	1	3	2	2	2	5	5	5	5	4	5	5	3	3	5	2	5	5	5	6	6	4	4	6	4	5	6	6	6	Female
2018-01-26 21:52:23	Yes	Yes	1	Yes	1	5 to 11 times per year	1	0				Yes	4 times or less per year	7	7	7	7	7	6	5	4	4	5	5	5	5	5	5	3	4	4	5	4	6	4	5	4	4	6	5	5	4	3	5	4	5	4	6	Female
2018-01-26 21:52:52	Yes	Yes	1	Yes	1	4 times or less per year	0	0				Yes	4 times or less per year	6	5	6	5	5	6	6	5	6	6	3	4	4	4	4	2	4	4	4	3	5	6	5	5	4	5	5	5	5	6	6	5	5	2	6	Female
2018-01-26 21:56:23	Yes	Yes	1	Yes	1	4 times or less per year	0	0				Yes	4 times or less per year	5	5	5	6	6	5	5	5	5	5	4	4	5	4	4	5	1	1	2	5	6	4	6	1	1	5	5	5	4	4	4	5	4	2	5	Male
2018-01-26 21:58:11	Yes	No	0	Yes	1	4 times or less per year	0	0				Yes	4 times or less per year	2	3	3	4	3	5	5	5	4	4	2	3	2	2	4	4	2	1	2	4	2	2	2	3	2	3	3	3	3	2	3	4	4	2	2	Male
2018-01-26 21:58:21	Yes	No	0	Yes	1	4 times or less per year	0	0				Yes	4 times or less per year	6	4	5	4	4	6	6	6	6	6	5	4	4	4	5	3	2	2	3	4	4	3	5	4	2	4	5	3	3	3	3	5	5	1	3	Female
2018-01-26 21:59:33	No			No	0		0	0				Yes																																					Female
2018-01-26 22:04:53	Yes	Yes	1	Yes	1	4 times or less per year	0	0				Yes	4 times or less per year	6	6	6	6	5	6	6	5	5	5	4	4	4	4	5	4	2	1	2	3	3	3	3	2	1	2	2	2	2	3	3	3	4	3	3	Male
2018-01-26 22:06:36	Yes	No	0	Yes	1	5 to 11 times per year	1	0				Yes	4 times or less per year	4	4	4	3	3	5	5	5	5	5	4	4	5	5	5	5	2	2	4	4	4	3	1	4	5	4	4	3	3	4	4	3	2	4	4	Female
2018-01-26 22:06:52	Yes	Yes	1	Yes	1	12 times or more per year	0	1				Yes	4 times or less per year	6	6	6	7	6	7	6	6	7	6	5	5	5	4	5	4	1	1	2	4	3	4	4	4	6	4	6	6	6	3	5	4	4	2	4	Female
2018-01-26 22:14:10	Yes	Yes	1	Yes	1	4 times or less per year	0	0				Yes	4 times or less per year	6	6	6	6	5	7	4	6	6	6	5	5	4	4	5	3	3	2	3	3	3	4	4	4	3	4	5	5	5	2	4	4	4	5	3	Female
2018-01-26 22:15:09	Yes	Yes	1	Yes	1	5 to 11 times per year	1	0				Yes	4 times or less per year	5	5	6	5	5	6	7	7	6	7	5	5	5	5	5	3	5	4	4	5	4	5	5	5	5	5	5	5	5	5	6	6	6	5	6	Female
2018-01-26 22:15:18	Yes	Yes	1	Yes	1	5 to 11 times per year	1	0				Yes	4 times or less per year	6	6	6	6	6	7	7	7	7	7	4	5	5	4	5	5	1	1	2	5	3	2	4	2	1	3	5	5	1	1	2	2	2	4	3	Female
2018-01-26 22:18:56	Yes	No	0	Yes	1	12 times or more per year	0	1				Yes	4 times or less per year	4	3	3	3	3	4	4	3	3	3	3	5	5	5	5	5	4	5	4	4	6	6	6	5	6	5	3	6	4	3	6	6	6	6	6	Male
2018-01-26 22:20:14	Yes	No	0	Yes	1	5 to 11 times per year	1	0				Yes	4 times or less per year	3	3	3	4	3	5	2	6	5	5	3	4	2	2	4	4	2	2	4	3	5	3	5	3	3	4	5	5	3	3	5	5	5	3	4	Male
2018-01-26 22:27:23	Yes	No	0	Yes	1	4 times or less per year	0	0				NO	4 times or less per year	2	3	3	3	3	5	2	5	3	4	4	4	3	2	3	4	2	2	3	3	5	3	4	4	2	4	4	5	3	2	5	4	5	2	4	Male
2018-01-26 22:34:12	Yes	Yes	1	Yes	1	12 times or more per year	0	1				Yes	4 times or less per year	6	6	6	7	6	7	5	6	7	7	4	5	5	4	5	3	1	2	1	5	4	1	5	5	1	5	5	4	3	4	2	5	5	2	4	Female
2018-01-26 22:44:17	Yes	Yes	1	Yes	1	12 times or more per year	0	1				Yes	4 times or less per year	7	7	7	7	7	7	7	7	7	7	5	5	5	5	5	2	5	4	4	2	4	4	6	4	3	4	5	5	5	5	4	6	6	5	4	Female
2018-01-26 22:45:13	Yes	No	0	Yes	1	12 times or more per year	0	1				Yes	4 times or less per year	4	4	4	4	4	7	5	5	6	6	5	5	5	5	5	4	2	1	4	4	5	4	4	4	2	4	5	5	3	3	4	5	5	5	5	Female
2018-01-26 22:49:36	Yes	Yes	1	Yes	1	5 to 11 times per year	1	0				Yes	4 times or less per year	7	7	7	7	6	7	7	7	7	6	5	5	5	4	5	5	2	5	2	5	6	5	5	4	3	5	4	3	2	5	5	5	5	4	6	Male
2018-01-26 22:50:21	Yes	Yes	1	Yes	1	4 times or less per year	0	0				Yes	4 times or less per year	6	6	7	6	4	6	6	6	7	6	3	4	4	4	5	2	3	3	4	2	5	2	2	4	2	4	6	5	6	3	2	5	4	2	5	Male
2018-01-26 22:52:49	Yes	No	0	Yes	1	12 times or more per year	0	1				Yes	4 times or less per year	3	3	3	3	3	3	5	4	3	3	4	4	3	4	5	4	2	4	4	5	5	3	2	3	4	5	5	3	4	2	2	3	3	3	4	Female
2018-01-26 22:52:54	Yes	Yes	1	Yes	1	12 times or more per year	0	1				Yes	12 times or more per year	2	3	3	3	4	5	5	6	5	2	2	3	1	1	1	3	2	1	1	4	5	5	2	5	2	5	4	5	2	2	4	5	5	2	5	Female
2018-01-26 22:53:42	No			No	0		0	0				Yes																																					Male
2018-01-26 22:56:58	Yes	No	0	Yes	1	12 times or more per year	0	1				Yes	5 to 11 times per year	4	4	6	4	4	4	6	4	4	4	3	5	5	5	5	4	3	1	1	5	4	4	1	1	1	1	5	6	4	3	6	1	6	6	4	Female
2018-01-26 23:04:12	Yes	No	0	Yes	1	4 times or less per year	0	0				Yes	4 times or less per year	3	3	2	2	1	3	4	4	3	3	2	3	2	1	2	3	1	4	3	2	5	4	5	6	1	5	5	5	5	5	5	4	4	2	6	Female
2018-01-26 23:05:04	Yes	Yes	1	Yes	1	4 times or less per year	0	0				Yes	4 times or less per year	4	4	7	7	7	7	7	7	7	7	5	5	5	5	5	4	2	3	3	2	2	2	4	3	4	3	4	4	2	2	3	4	4	3	3	Male
2018-01-26 23:17:55	No			No	0		0	0				Yes																																					Male
2018-01-26 23:18:44	Yes	No	0	Yes	1	4 times or less per year	0	0				Yes	4 times or less per year	6	6	6	5	4	5	5	6	6	6	4	4	3	3	3	4	4	2	3	4	3	3	5	2	4	4	5	3	2	2	3	4	4	2	2	Female
2018-01-26 23:19:05	Yes	No	0	Yes	1	4 times or less per year	0	0				Yes	4 times or less per year	6	6	6	5	4	5	5	6	6	6	4	4	3	3	3	4	4	2	3	4	3	3	5	2	4	4	5	3	2	2	3	4	4	2	2	Female
2018-01-26 23:19:08	Yes	No	0	Yes	1	4 times or less per year	0	0				Yes	4 times or less per year	6	6	6	5	4	5	5	6	6	6	4	4	3	3	3	4	4	2	3	4	3	3	5	2	4	4	5	3	2	2	3	4	4	2	2	Female
2018-01-26 23:20:27	Yes	Yes	1	Yes	1	5 to 11 times per year	1	0				Yes	4 times or less per year	7	7	7	7	6	7	6	7	7	6	5	5	5	5	5	5	1	1	1	4	3	4	5	2	2	4	4	4	3	2	5	5	5	2	3	Female
2018-01-26 23:23:42	Yes	Yes	1	Yes	1	5 to 11 times per year	1	0				Yes	4 times or less per year	7	7	7	7	7	7	7	6	6	6	5	5	4	4	5	1	5	1	4	1	1	1	1	1	2	1	2	4	2	1	1	1	1	5	1	Female
2018-01-26 23:26:54	Yes	Yes	1	Yes	1	12 times or more per year	0	1				Yes	4 times or less per year	6	6	6	6	7	7	7	6	6	6	4	4	4	5	4	4	1	1	2	4	5	5	2	4	2	4	5	4	5	2	5	3	2	5	4	Female
2018-01-26 23:56:21	Yes	Yes	1	Yes	1	5 to 11 times per year	1	0				Yes	4 times or less per year	6	6	5	5	5	6	6	6	6	6	3	4	4	4	4	4	5	3	4	3	5	2	4	5	2	3	4	4	4	2	5	5	4	3	3	Female
2018-01-26 23:57:53	Yes	No	0	Yes	1	5 to 11 times per year	1	0				Yes	4 times or less per year	3	3	3	3	3	5	4	5	5	4	3	4	5	2	3	5	1	1	3	5	2	4	2	1	1	3	2	5	3	1	5	3	2	4	2	Female
2018-01-27 00:02:21	Yes	Yes	1	Yes	1	12 times or more per year	0	1				Yes	4 times or less per year	7	7	7	6	7	7	7	7	7	7	5	5	5	5	5	4	1	4	3	4	5	3	4	4	4	4	6	5	4	4	4	4	4	4	4	Female
2018-01-27 00:31:22	Yes	Yes	1	Yes	1	12 times or more per year	0	1				Yes	4 times or less per year	7	7	7	7	7	7	7	7	7	7	5	5	4	4	5	4	5	4	5	5	6	4	5	6	3	6	5	6	5	3	5	5	6	4	6	Female
2018-01-27 00:37:14	Yes	Yes	1	Yes	1	5 to 11 times per year	1	0				Yes	4 times or less per year	7	7	7	7	7	7	7	7	7	7	4	5	5	5	5	4	2	1	2	4	4	5	4	2	4	5	4	3	3	2	5	5	5	3	3	Male
2018-01-27 00:43:05	No			No	0		0	0				Yes																																					Female
2018-01-27 01:13:22	Yes	No	0	Yes	1	12 times or more per year	0	1				Yes	4 times or less per year	5	5	5	4	5	4	4	5	5	3	2	3	2	2	3	4	3	4	4	5	5	3	4	6	3	3	6	5	5	5	3	5	4	3	6	Female
2018-01-27 01:14:41	Yes	No	0	Yes	1	12 times or more per year	0	1				Yes	12 times or more per year	3	5	2	4	2	5	4	3	6	6	3	2	5	4	2	3	2	5	1	4	6	1	5	2	1	1	5	4	1	5	2	3	3	5	5	Male
2018-01-27 01:16:18	Yes	No	0	Yes	1	4 times or less per year	0	0				Yes	4 times or less per year	2	2	2	3	2	6	3	2	1	1	5	5	5	5	5	4	2	5	4	3	5	4	2	6	2	4	6	3	5	2	5	5	6	1	3	Female
2018-01-27 01:17:32	Yes	No	0	Yes	1	12 times or more per year	0	1				Yes	12 times or more per year	4	6	4	5	2	6	5	2	4	6	2	2	4	1	4	3	2	4	4	1	3	5	2	5	2	3	5	1	4	2	5	2	3	4	5	Female
2018-01-27 01:19:32	Yes	Yes	1	Yes	1	5 to 11 times per year	1	0				Yes	4 times or less per year	6	6	6	6	6	6	6	5	5	7	3	3	3	3	5	5	1	1	1	5	4	3	5	4	2	5	5	6	3	5	4	5	5	3	4	Female
2018-01-27 01:31:30	Yes	Yes	1	Yes	1	4 times or less per year	0	0				Yes	4 times or less per year	7	7	7	7	7	7	7	7	7	7	5	5	5	5	5	5	1	2	2	2	5	5	4	5	3	5	4	4	2	1	5	5	4	5	5	Female
2018-01-27 01:32:15	Yes	Yes	1	Yes	1	4 times or less per year	0	0				Yes	4 times or less per year	7	7	7	7	7	7	7	7	7	7	5	5	5	5	5	5	1	2	2	2	5	5	4	5	3	5	4	4	2	1	5	5	4	5	5	Female
2018-01-27 01:37:57	Yes	No	0	Yes	1	4 times or less per year	0	0				Yes	4 times or less per year	3	4	3	4	2	4	4	2	4	3	3	3	2	3	4	4	3	4	3	5	5	3	5	4	5	5	3	4	3	2	4	5	5	2	5	Male
2018-01-27 01:41:37	Yes	Yes	1	Yes	1	12 times or more per year	0	1				Yes	4 times or less per year	6	6	3	5	4	4	4	2	6	3	2	3	4	4	5	4	3	1	1	1	3	4	4	4	2	3	3	3	3	4	4	4	3	2	5	Female
2018-01-27 02:32:46	Yes	Yes	1	Yes	1	12 times or more per year	0	1				Yes	4 times or less per year	7	7	7	7	7	7	7	7	7	7	5	5	5	5	5	4	1	2	2	5	2	3	3	4	1	2	4	2	2	2	3	4	4	1	3	Female
2018-01-27 02:45:43	Yes	Yes	1	Yes	1	12 times or more per year	0	1				Yes	4 times or less per year	6	6	6	5	5	6	6	6	6	6	4	4	4	4	5	3	1	1	1	4	5	4	5	4	3	5	5	4	4	5	5	5	5	4	6	Female
2018-01-27 03:04:55	Yes	Yes	1	Yes	1	4 times or less per year	0	0				Yes	4 times or less per year	6	5	5	4	5	6	6	6	6	6	4	5	4	4	5	4	2	1	3	5	4	4	2	4	3	3	5	4	4	2	4	3	4	1	3	Female
2018-01-27 03:13:05	Yes	Yes	1	Yes	1	12 times or more per year	0	1				Yes	12 times or more per year	6	6	6	6	6	6	6	7	7	7	5	4	5	3	5	4	5	2	3	4	5	1	1	5	4	3	6	2	2	2	4	3	3	1	4	Female
2018-01-27 03:26:52	Yes	Yes	1	Yes	1	5 to 11 times per year	1	0				Yes	4 times or less per year	7	7	7	7	7	7	7	7	7	7	5	5	5	5	5	4	1	1	1	5	5	4	1	1	1	2	6	2	1	1	4	5	5	4	5	Female
2018-01-27 03:58:00	Yes	Yes	1	Yes	1	5 to 11 times per year	1	0				Yes	4 times or less per year	7	7	7	7	7	7	7	7	7	7	5	5	5	5	5	4	2	2	2	4	4	4	5	5	2	5	6	6	4	2	4	4	4	2	4	Female
2018-01-27 04:31:27	Yes	Yes	1	Yes	1	5 to 11 times per year	1	0				Yes	4 times or less per year	4	4	4	4	4	6	4	6	6	6	4	5	5	5	5	1	1	1	2	2	5	4	1	4	1	6	4	4	5	4	6	3	3	3	3	Female
2018-01-27 04:33:36	Yes	Yes	1	Yes	1	5 to 11 times per year	1	0				Yes	4 times or less per year	6	6	5	5	5	6	6	6	5	6	4	4	4	4	4	4	2	2	2	4	3	4	4	2	2	5	4	5	4	2	2	4	5	4	5	Male
2018-01-27 04:38:14	Yes	Yes	1	Yes	1	4 times or less per year	0	0				Yes	4 times or less per year	5	5	6	5	5	7	7	7	7	7	5	5	5	5	5	3	3	2	4	4	4	5	5	5	4	4	5	4	3	5	6	4	4	2	5	Female
2018-01-27 04:56:02	No			No	0		0	0				Yes																																					Female
2018-01-27 06:21:01	No			No	0		0	0				Yes																																					Male
2018-01-27 06:34:13	Yes	Yes	1	Yes	1	5 to 11 times per year	1	0				Yes	5 to 11 times per year	7	7	7	7	7	7	7	7	7	7	5	5	5	5	5	5	3	2	5	5	5	2	5	5	5	5	5	5	6	2	5	5	4	5	4	Male
2018-01-27 06:48:17	Yes	No	0	Yes	1	12 times or more per year	0	1				Yes	4 times or less per year	2	2	2	2	2	2	2	2	4	4	3	2	3	3	3	2	4	4	4	2	5	5	5	5	5	5	5	6	5	3	5	5	5	2	5	Female
2018-01-27 07:09:40	Yes	No	0	Yes	1	5 to 11 times per year	1	0				Yes	4 times or less per year	7	7	7	7	7	6	7	6	7	6	5	5	5	5	5	4	2	1	1	3	5	4	6	4	2	5	5	4	2	2	4	6	6	3	5	Female
2018-01-27 07:14:26	Yes	Yes	1	Yes	1	4 times or less per year	0	0				Yes	4 times or less per year	6	5	6	6	6	6	6	7	6	6	4	4	5	4	5	5	1	1	3	4	4	4	1	5	4	5	6	4	2	2	5	2	2	2	4	Female
2018-01-27 07:19:36	Yes	Yes	1	Yes	1	4 times or less per year	0	0				Yes	4 times or less per year	7	7	7	7	4	3	2	1	4	1	5	5	4	4	5	1	5	5	5	3	5	6	6	6	4	6	6	6	4	6	6	6	6	4	6	Male
2018-01-27 07:20:08	Yes	No	0	Yes	1	12 times or more per year	0	1				Yes	4 times or less per year	5	4	5	3	3	7	6	7	6	5	5	5	3	2	5	5	4	1	5	2	2	3	5	2	3	4	4	2	3	3	3	5	5	6	2	Male
2018-01-27 07:26:23	Yes	Yes	1	Yes	1	12 times or more per year	0	1				Yes	4 times or less per year	7	6	6	7	6	7	7	7	7	7	4	4	5	4	4	1	5	5	5	1	6	6	6	5	5	6	4	4	4	5	5	6	6	2	6	Female
2018-01-27 07:35:35	Yes	No	0	Yes	1	12 times or more per year	0	1				Yes	4 times or less per year	4	4	4	5	2	6	6	6	7	6	5	5	4	4	5	3	5	4	5	3	5	6	6	5	2	5	6	6	4	4	5	6	6	2	5	Female
2018-01-27 07:40:15	Yes	Yes	1	Yes	1	12 times or more per year	0	1				Yes	4 times or less per year	6	6	6	6	6	7	7	6	6	6	4	5	5	5	5	5	1	1	1	5	6	6	5	6	1	6	6	6	4	5	6	5	5	5	6	Female
2018-01-27 07:54:45	Yes	No	0	Yes	1	5 to 11 times per year	1	0				Yes	4 times or less per year	4	3	3	3	3	5	4	4	5	5	4	4	4	4	4	2	4	4	4	3	3	4	4	4	4	3	4	3	4	4	4	4	3	2	2	Female
2018-01-27 08:03:20	Yes	No	0	Yes	1	5 to 11 times per year	1	0				Yes	4 times or less per year	4	4	5	4	2	6	4	5	5	5	3	5	5	5	4	1	5	2	4	2	5	4	4	5	6	5	5	4	4	5	5	4	4	4	5	Female
2018-01-27 08:20:29	Yes	Yes	1	Yes	1	4 times or less per year	0	0				Yes	4 times or less per year	5	5	5	5	7	6	5	6	7	6	4	5	4	4	5	5	1	1	1	5	5	4	5	4	3	5	6	4	2	3	4	5	5	1	5	Female
2018-01-27 08:36:03	No			No	0		0	0				Yes																																					Female
2018-01-27 08:41:25	Yes	Yes	1	Yes	1	5 to 11 times per year	1	0				Yes	4 times or less per year	6	6	6	6	6	7	6	7	6	6	5	5	5	5	5	4	2	2	2	4	4	3	6	4	5	5	3	5	4	4	5	4	4	4	4	Male
2018-01-27 08:46:23	Yes	Yes	1	Yes	1	5 to 11 times per year	1	0				Yes	4 times or less per year	4	4	5	5	5	4	3	3	3	3	4	4	3	4	4	4	1	1	1	4	5	4	4	4	5	4	4	4	1	5	5	4	4	1	4	Female
2018-01-27 08:46:50	Yes	Yes	1	Yes	1	4 times or less per year	0	0				Yes	4 times or less per year	6	6	6	6	7	6	7	5	7	7	4	5	5	5	5	3	1	3	3	1	5	5	6	6	5	5	5	4	2	5	5	5	6	5	6	Male
2018-01-27 08:48:59	Yes	Yes	1	Yes	1	12 times or more per year	0	1				Yes	12 times or more per year	7	7	7	7	7	7	7	7	7	7	5	5	5	5	5	5	1	1	1	5	4	2	5	5	3	5	6	5	1	5	2	5	6	4	3	Female
2018-01-27 08:53:09	Yes	Yes	1	Yes	1	12 times or more per year	0	1				Yes	4 times or less per year	7	7	7	7	7	7	4	5	6	6	5	5	5	5	5	4	1	1	2	4	6	5	6	5	2	5	6	2	1	6	3	6	6	4	5	Female
2018-01-27 09:02:43	Yes	Yes	1	Yes	1	12 times or more per year	0	1				Yes	4 times or less per year	6	7	7	7	6	7	6	7	7	7	4	5	5	5	5	1	5	4	5	1	5	6	5	2	6	5	3	4	5	5	6	4	5	6	5	Male
2018-01-27 09:13:19	Yes	Yes	1	Yes	1	5 to 11 times per year	1	0				Yes	4 times or less per year	7	7	7	7	7	7	7	7	7	7	5	5	5	5	5	3	2	3	4	3	4	3	4	4	4	5	4	4	3	3	5	4	4	5	3	Female
2018-01-27 09:19:46	Yes	No	0	Yes	1	12 times or more per year	0	1				Yes	5 to 11 times per year	4	3	3	4	4	5	4	5	5	5	4	4	3	3	4	4	5	4	5	3	5	6	6	3	6	2	3	6	4	3	5	5	5	1	4	Female
2018-01-27 09:20:51	Yes	Yes	1	Yes	1	4 times or less per year	0	0				Yes	4 times or less per year	6	6	6	6	6	6	6	7	7	6	4	5	4	5	5	4	1	2	1	4	2	1	5	1	1	3	3	4	5	1	1	5	6	2	2	Female
2018-01-27 09:24:47	Yes	Yes	1	Yes	1	5 to 11 times per year	1	0				Yes	4 times or less per year	6	6	7	5	6	6	5	6	6	5	5	5	5	4	5	2	5	4	4	1	6	4	5	4	4	6	5	5	4	6	5	6	5	3	6	Male
2018-01-27 09:34:24	Yes	Yes	1	Yes	1	12 times or more per year	0	1				Yes	4 times or less per year	7	7	7	7	6	7	6	7	7	7	5	5	5	5	5	4	2	2	4	5	5	6	6	4	2	6	5	5	6	5	5	6	6	2	6	Female
2018-01-27 09:42:28	Yes	Yes	1	Yes	1	12 times or more per year	0	1				Yes	4 times or less per year	7	7	7	7	7	7	7	7	7	7	5	5	5	5	5	4	2	1	3	4	5	6	4	5	5	5	5	4	4	5	5	5	5	2	5	Female
2018-01-27 09:45:43	Yes	Yes	1	Yes	1	12 times or more per year	0	1				Yes	4 times or less per year	7	7	7	7	7	7	7	7	7	7	5	5	5	5	5	4	2	1	3	4	5	5	5	5	4	5	5	4	4	5	5	5	5	6	5	Female
2018-01-27 09:58:43	No			No	0		0	0				Yes																																					Female
2018-01-27 10:11:59	No			No	0		0	0				Yes																																					Female
2018-01-27 10:51:56	Yes	Yes	1	Yes	1	5 to 11 times per year	1	0				Yes	4 times or less per year	6	5	6	5	5	6	5	4	5	5	4	4	5	4	5	2	5	5	5	1	5	3	5	5	3	5	5	3	3	4	4	5	4	5	5	Male
2018-01-27 10:55:25	Yes	Yes	1	Yes	1	4 times or less per year	0	0				Yes	4 times or less per year	7	6	6	6	6	6	6	6	6	6	5	5	5	5	5	2	1	1	4	3	6	6	6	5	5	5	4	5	5	6	6	6	6	3	6	Female
2018-01-27 11:01:26	Yes	Yes	1	Yes	1	4 times or less per year	0	0				Yes	4 times or less per year	6	6	6	5	5	6	6	6	6	6	4	4	4	4	4	3	5	2	4	3	4	5	5	5	5	5	4	4	3	4	5	5	5	4	4	Male
2018-01-27 11:26:23	Yes	Yes	1	Yes	1	12 times or more per year	0	1				Yes	4 times or less per year	6	6	6	6	6	6	6	6	6	7	4	5	5	4	5	4	3	2	4	3	6	4	5	4	4	5	4	5	5	4	5	5	5	4	6	Male
2018-01-27 11:34:24	Yes	Yes	1	Yes	1	4 times or less per year	0	0				Yes	4 times or less per year	7	7	7	7	6	7	7	7	7	7	5	5	5	5	5	3	1	1	3	2	5	5	5	3	6	5	4	6	2	6	6	5	5	5	5	Female
2018-01-27 11:40:28	Yes	Yes	1	Yes	1	4 times or less per year	0	0				Yes	4 times or less per year	6	6	6	6	4	7	6	6	7	7	5	5	5	5	5	1	5	4	4	1	2	2	4	2	2	3	2	2	2	2	2	4	5	2	2	Male
2018-01-27 12:01:27	Yes	Yes	1	Yes	1	12 times or more per year	0	1				Yes	4 times or less per year	6	6	6	5	5	6	6	5	6	6	4	4	5	4	5	5	3	1	2	4	6	2	6	4	2	6	4	4	2	6	2	6	6	2	6	Male
2018-01-27 12:21:47	Yes	Yes	1	Yes	1	4 times or less per year	0	0				Yes	4 times or less per year	7	7	7	7	7	7	7	7	7	7	5	5	5	5	5	4	1	1	2	5	4	5	3	5	1	5	3	5	1	6	5	4	3	1	4	Female
2018-01-27 12:22:21	Yes	Yes	1	Yes	1	12 times or more per year	0	1				Yes	4 times or less per year	7	7	7	7	7	7	7	7	7	7	5	5	5	5	5	4	2	1	3	4	2	1	3	1	2	2	2	1	1	3	1	3	3	4	3	Female
2018-01-27 12:28:51	Yes	Yes	1	Yes	1	5 to 11 times per year	1	0				Yes	4 times or less per year	6	6	6	6	6	6	6	5	6	6	5	5	5	4	5	4	1	2	3	4	3	3	2	4	4	3	5	5	2	2	3	2	2	4	2	Male
2018-01-27 12:29:03	Yes	Yes	1	Yes	1	12 times or more per year	0	1				Yes	4 times or less per year	7	7	7	7	7	7	6	6	7	7	4	4	4	4	5	5	1	1	3	4	6	5	6	4	5	6	6	6	5	6	5	6	6	6	6	Female
2018-01-27 12:30:41	Yes	Yes	1	Yes	1	12 times or more per year	0	1				Yes	4 times or less per year	6	6	6	7	6	7	6	6	6	6	5	5	5	4	5	2	5	5	5	1	6	6	6	6	6	6	5	5	5	5	6	5	6	5	6	Male
2018-01-27 12:42:41	Yes	Yes	1	Yes	1	5 to 11 times per year	1	0				Yes	4 times or less per year	7	7	7	7	7	7	6	7	7	6	4	4	5	5	4	5	2	2	2	1	3	6	5	2	1	5	6	5	5	4	6	6	5	5	6	Male
2018-01-27 13:36:12	Yes	Yes	1	Yes	1	5 to 11 times per year	1	0				Yes	4 times or less per year	7	7	7	7	7	6	6	5	5	5	4	5	5	5	5	3	1	2	2	4	5	5	6	3	5	5	4	4	2	4	4	5	5	3	5	Female
2018-01-27 13:48:24	Yes	Yes	1	Yes	1	12 times or more per year	0	1				Yes	4 times or less per year	7	7	7	7	7	7	7	7	7	6	5	5	5	4	5	4	2	1	1	4	4	3	5	4	1	3	3	1	1	3	3	5	4	1	4	Male
2018-01-27 13:53:33	Yes	Yes	1	Yes	1	5 to 11 times per year	1	0				Yes	4 times or less per year	6	6	5	5	5	6	5	6	5	6	5	5	5	5	5	4	1	3	2	4	5	5	5	5	2	5	4	3	3	5	5	4	5	5	5	Male
2018-01-27 14:19:17	Yes	Yes	1	Yes	1	12 times or more per year	0	1				Yes	4 times or less per year	7	7	7	7	7	7	7	7	7	7	4	5	5	5	5	4	3	2	4	5	4	4	5	5	2	4	2	2	2	3	4	5	5	2	5	Male
2018-01-27 14:32:47	Yes	Yes	1	Yes	1	12 times or more per year	0	1				Yes	4 times or less per year	6	6	6	6	5	7	6	5	6	6	4	4	5	5	5	4	2	1	3	4	6	2	6	3	4	5	4	2	2	5	4	6	6	3	5	Male
2018-01-27 14:33:41	Yes	Yes	1	Yes	1	12 times or more per year	0	1				Yes	4 times or less per year	5	5	5	6	5	7	7	7	7	7	4	5	4	4	5	3	2	2	2	3	6	3	4	5	3	5	6	5	2	5	5	5	5	3	5	Female
2018-01-27 14:38:33	Yes	No	0	Yes	1	4 times or less per year	0	0				Yes	4 times or less per year	5	3	3	3	3	6	5	5	5	4	4	5	5	4	5	4	1	1	3	2	4	1	2	2	2	2	5	4	2	4	3	2	4	3	2	Male
2018-01-27 15:35:55	Yes	No	0	Yes	1	12 times or more per year	0	1				Yes	5 to 11 times per year	5	5	3	5	3	6	3	4	6	2	5	5	2	3	5	4	2	1	2	4	4	4	5	1	4	5	6	6	3	5	5	5	3	2	4	Male
2018-01-27 17:12:50	Yes	Yes	1	Yes	1	4 times or less per year	0	0				Yes	4 times or less per year	7	7	6	5	7	7	7	7	7	7	5	5	5	5	5	4	2	1	2	1	6	6	6	6	2	6	5	6	6	6	6	6	6	4	6	Male
2018-01-27 17:33:43	No			No	0		0	0				Yes																																					Male
2018-01-27 17:34:15	No			No	0		0	0				Yes																																					Male
2018-01-27 17:34:21	No			No	0		0	0				Yes																																					Male
2018-01-27 17:34:28	No			No	0		0	0				Yes																																					Male
2018-01-27 17:39:49	Yes	Yes	1	Yes	1	12 times or more per year	0	1				Yes	4 times or less per year	7	7	7	7	7	7	7	7	7	7	5	5	4	5	5	5	1	2	1	5	5	1	5	3	1	5	5	3	2	4	4	4	5	5	2	Male
2018-01-27 19:31:46	Yes	Yes	1	Yes	1	5 to 11 times per year	1	0				Yes	4 times or less per year	7	7	7	7	6	6	6	6	6	6	5	4	3	4	4	3	4	2	4	3	5	3	5	4	4	5	4	2	2	5	4	5	5	2	5	Female
2018-01-27 19:42:43	Yes	Yes	1	Yes	1	4 times or less per year	0	0				Yes	4 times or less per year	6	4	5	6	5	7	6	6	6	4	5	5	5	5	5	4	2	3	4	3	4	5	3	4	5	5	6	2	3	4	4	2	3	4	4	Female
2018-01-27 22:08:40	Yes	Yes	1	Yes	1	4 times or less per year	0	0				Yes	4 times or less per year	6	5	5	4	4	6	5	3	3	4	4	5	4	4	5	2	2	1	2	3	4	3	4	4	4	5	4	3	3	4	3	4	4	2	5	Male
2018-01-27 22:27:43	Yes	No	0	Yes	1	4 times or less per year	0	0				Yes	4 times or less per year	5	5	4	4	1	6	6	6	6	6	4	5	5	4	5	4	2	2	2	3	4	5	5	4	3	4	5	5	3	4	5	5	5	2	3	Male
2018-01-27 23:07:47	Yes	Yes	1	Yes	1	5 to 11 times per year	1	0				Yes	4 times or less per year	7	7	7	7	6	6	6	7	6	7	4	5	5	4	4	4	1	5	5	1	6	1	4	4	1	6	5	6	4	2	1	4	5	5	6	Male
2018-01-28 00:17:01	Yes	Yes	1	Yes	1	12 times or more per year	0	1				Yes	4 times or less per year	7	7	7	7	7	7	7	7	7	7	4	5	5	5	5	3	3	2	3	2	4	3	3	5	3	4	6	5	3	3	3	4	4	2	3	Female
2018-01-28 01:27:26	Yes	No	0	Yes	1	12 times or more per year	0	1				Yes	4 times or less per year	3	4	4	5	4	2	2	3	2	2	1	1	1	1	2	5	1	2	1	4	3	3	1	2	2	3	4	1	1	3	5	2	2	6	2	Female
2018-01-28 01:57:12	Yes	Yes	1	Yes	1	12 times or more per year	0	1				Yes	4 times or less per year	7	7	7	7	7	7	7	7	7	7	5	5	5	5	5	4	3	2	4	5	3	3	5	2	1	3	5	5	4	3	4	4	4	3	4	Female
2018-01-28 01:57:55	Yes	Yes	1	Yes	1	12 times or more per year	0	1				Yes	4 times or less per year	7	7	7	7	7	7	7	7	7	7	5	5	5	5	5	4	3	2	4	5	3	3	5	2	1	3	5	5	4	3	4	4	4	3	4	Female
2018-01-28 07:38:01	Yes	Yes	1	Yes	1	4 times or less per year	0	0				Yes	4 times or less per year	7	7	7	7	7	7	7	7	7	7	5	5	5	5	5	1	4	4	3	4	2	3	3	3	2	2	2	1	1	3	3	2	3	2	2	Male
2018-01-28 08:34:29	Yes	Yes	1	Yes	1	4 times or less per year	0	0				Yes	4 times or less per year	7	7	7	7	7	7	7	7	5	6	5	5	4	4	5	5	1	1	3	4	6	5	6	5	3	5	6	4	2	5	4	6	6	2	5	Female
2018-01-28 08:49:43	Yes	Yes	1	Yes	1	12 times or more per year	0	1				Yes	5 to 11 times per year	6	6	7	7	7	7	7	7	6	6	5	5	3	3	5	5	1	3	5	5	6	6	6	6	6	6	6	6	6	2	6	6	6	6	4	Female
2018-01-28 09:44:50	Yes	Yes	1	Yes	1	4 times or less per year	0	0				Yes	4 times or less per year	4	5	5	5	5	5	4	5	4	4	3	3	3	4	3	3	1	3	2	4	6	4	5	4	2	5	4	6	3	4	3	5	5	3	4	Female
2018-01-28 09:55:38	Yes	Yes	1	Yes	1	4 times or less per year	0	0				Yes	4 times or less per year	7	7	7	7	7	7	7	7	7	7	5	5	5	5	5	4	4	2	3	4	4	3	4	4	2	4	2	3	2	2	4	4	4	5	3	Male
2018-01-28 11:04:12	Yes	Yes	1	Yes	1	12 times or more per year	0	1				Yes	4 times or less per year	7	7	7	7	7	7	7	7	7	7	5	5	5	5	5	1	5	3	5	5	6	6	6	6	1	6	6	6	6	6	1	6	6	1	6	Female
2018-01-28 11:22:20	Yes	Yes	1	Yes	1	5 to 11 times per year	1	0				Yes	4 times or less per year	6	6	6	6	6	7	6	6	7	7	4	5	4	4	5	4	1	1	2	4	5	4	4	5	4	5	5	3	3	4	4	4	4	3	4	Female
2018-01-28 13:17:58	Yes	No	0	Yes	1	5 to 11 times per year	1	0				Yes	4 times or less per year	2	2	2	2	1	1	1	2	1	1	1	1	3	2	3	3	1	2	4	2	3	2	3	5	2	3	4	2	3	3	3	3	3	3	4	Female
2018-01-28 17:17:11	Yes	Yes	1	Yes	1	12 times or more per year	0	1				Yes	4 times or less per year	6	6	6	6	6	7	7	5	6	5	4	4	5	4	5	2	3	4	5	2	4	3	4	3	2	5	5	5	5	4	5	5	5	1	4	Female
2018-01-28 18:00:24	Yes	Yes	1	Yes	1	5 to 11 times per year	1	0				Yes	4 times or less per year	6	6	7	6	6	6	6	6	7	6	5	5	5	5	5	5	1	3	2	5	6	6	6	5	5	6	6	5	4	6	6	6	6	2	6	Male
2018-01-28 18:03:33	Yes	Yes	1	Yes	1	5 to 11 times per year	1	0				Yes	4 times or less per year	6	6	7	6	6	6	6	7	6	6	5	5	5	4	5	5	1	3	2	5	6	6	6	4	5	6	6	4	4	6	6	6	6	4	6	Male
2018-01-28 19:47:39	Yes	No	0	Yes	1	5 to 11 times per year	1	0				Yes	5 to 11 times per year	6	5	4	6	5	6	4	5	4	5	3	4	4	3	4	3	4	3	3	3	5	2	4	3	3	5	4	5	5	3	3	5	4	5	4	Female
2018-01-29 04:32:20	Yes	Yes	1	Yes	1	4 times or less per year	0	0				Yes	4 times or less per year	7	7	7	4	6	7	7	7	7	7	5	5	5	5	5	3	4	1	3	3	6	5	3	5	3	5	3	4	4	4	5	4	4	3	5	Female
2018-01-29 08:54:42	Yes	Yes	1	Yes	1	5 to 11 times per year	1	0				Yes	4 times or less per year	5	5	5	6	5	6	6	6	6	6	4	5	5	4	5	2	4	4	4	3	5	2	5	4	5	3	4	6	5	4	4	5	5	2	4	Male
2018-01-29 09:30:05	No			No	0		0	0				Yes																																					Female
2018-01-29 09:44:34	Yes	Yes	1	Yes	1	12 times or more per year	0	1				Yes	4 times or less per year	7	7	7	7	6	7	7	7	7	7	5	5	5	5	5	4	3	4	4	2	4	4	4	2	4	4	5	5	3	2	3	4	4	3	3	Female
2018-01-29 15:23:50	Yes	Yes	1					0				Yes	4 times or less per year	6	6	6	6	4	7	4	5	5	5	5	5	5	5	4	4	1	1	3	5	5	1	1	4	1	2	5	3	1	4	4	5	5	1	5	Female
[truncated: 9 more columns]

## Sheet: Form Responses 1
Timestamp	Have you ever had the occasion to use prescription medications?	Have you ever received automated telephone calls from a pharmacy?	Do you like receiving automated telephone calls from a pharmacy?	How often do you receive automated telephone calls from a pharmacy?	How often have you contacted a Pharmacy for clarification of a message received from an automated telephone message?	After receiving an automated phone call from a pharmacy, which of the following best describes your experience?	After receiving an automated phone call from a pharmacy, which of the following best describes your experience?	After receiving an automated phone call from a pharmacy, which of the following best describes your experience?	After receiving an automated phone call from a pharmacy, which of the following best describes your experience?	After receiving an automated phone call from a pharmacy, which of the following best describes your experience?	After receiving automated telephone calls from a pharmacy, how relevant was the information provided?	After receiving automated telephone calls from a pharmacy, how meaningful was the information provided?	After receiving automated telephone calls from a pharmacy, how important was the information provided?	After receiving automated telephone calls from a pharmacy, how useful was the information provided?	After receiving automated telephone calls from a pharmacy, how helpful was the information provided?	To what extent do you feel that the communication received from the automated telephone message is:	To what extent do you feel that the communication received from the automated telephone message is:	To what extent do you feel that the communication received from the automated telephone message is:	To what extent do you feel that the communication received from the automated telephone message is:	To what extent do you feel that the communication received from the automated telephone message is:	I am always courteous even to people who are disagreeable.	There have been occasions when I took advantage of someone.	I sometimes try to get even rather than forgive and forget.	I sometimes feel resentful when I don't get my way.	No matter who I'm talking to, I'm always a good listener.	I don't like situations that are uncertain.	I dislike questions which could be answered in many different ways.	I find that a well ordered life with regular hours suit my temperament.	I feel uncomfortable when I don't understand the reason why an event occurred in my life.	I feel irritated when one person disagrees with what everyone else in a group believes.	I don't like to go into a situation without knowing what I can expect from it.	When I have made a decision, I feel relieved.	When I am confronted with a problem, I'm dying to reach a solution very quickly.	I would quickly become impatient and irritated if I would not find a solution to a problem immediately.	I don't like to be with people who are capable of unexpected actions.	I dislike it when a person's statement could mean many different things.	I find that establishing a consistent routine enables me to enjoy life more.	I enjoy having a clear and structured mode of life.	I do not usually consult many different opinions before forming my own view.	I dislike unpredictable situations.	Sex	Age	Education	Marital Status	Ethnicity or Origin (check all that apply)	Annual Household Income
2018-01-01 09:11:23	No	No
2018-01-02 20:06:18	Yes	Yes	No	4 times or less per year	4 times or less per year	2	3	3	1	1	2	1	1	1	3	2	2	1	1	5	4	2	2	3	3	4	2	3	2	3	2	2	5	1	1	2	2	4	2	3	Male	18-24 years	Bachelor's degree	Single/never married	African-American/Black	$150 K to less than $200 K
